# Supplementary material
Source: PubMed Central journal article supplement (PMC1609916)
Supplement: bj3990249add.pdf [file bj3990249add.pdf]

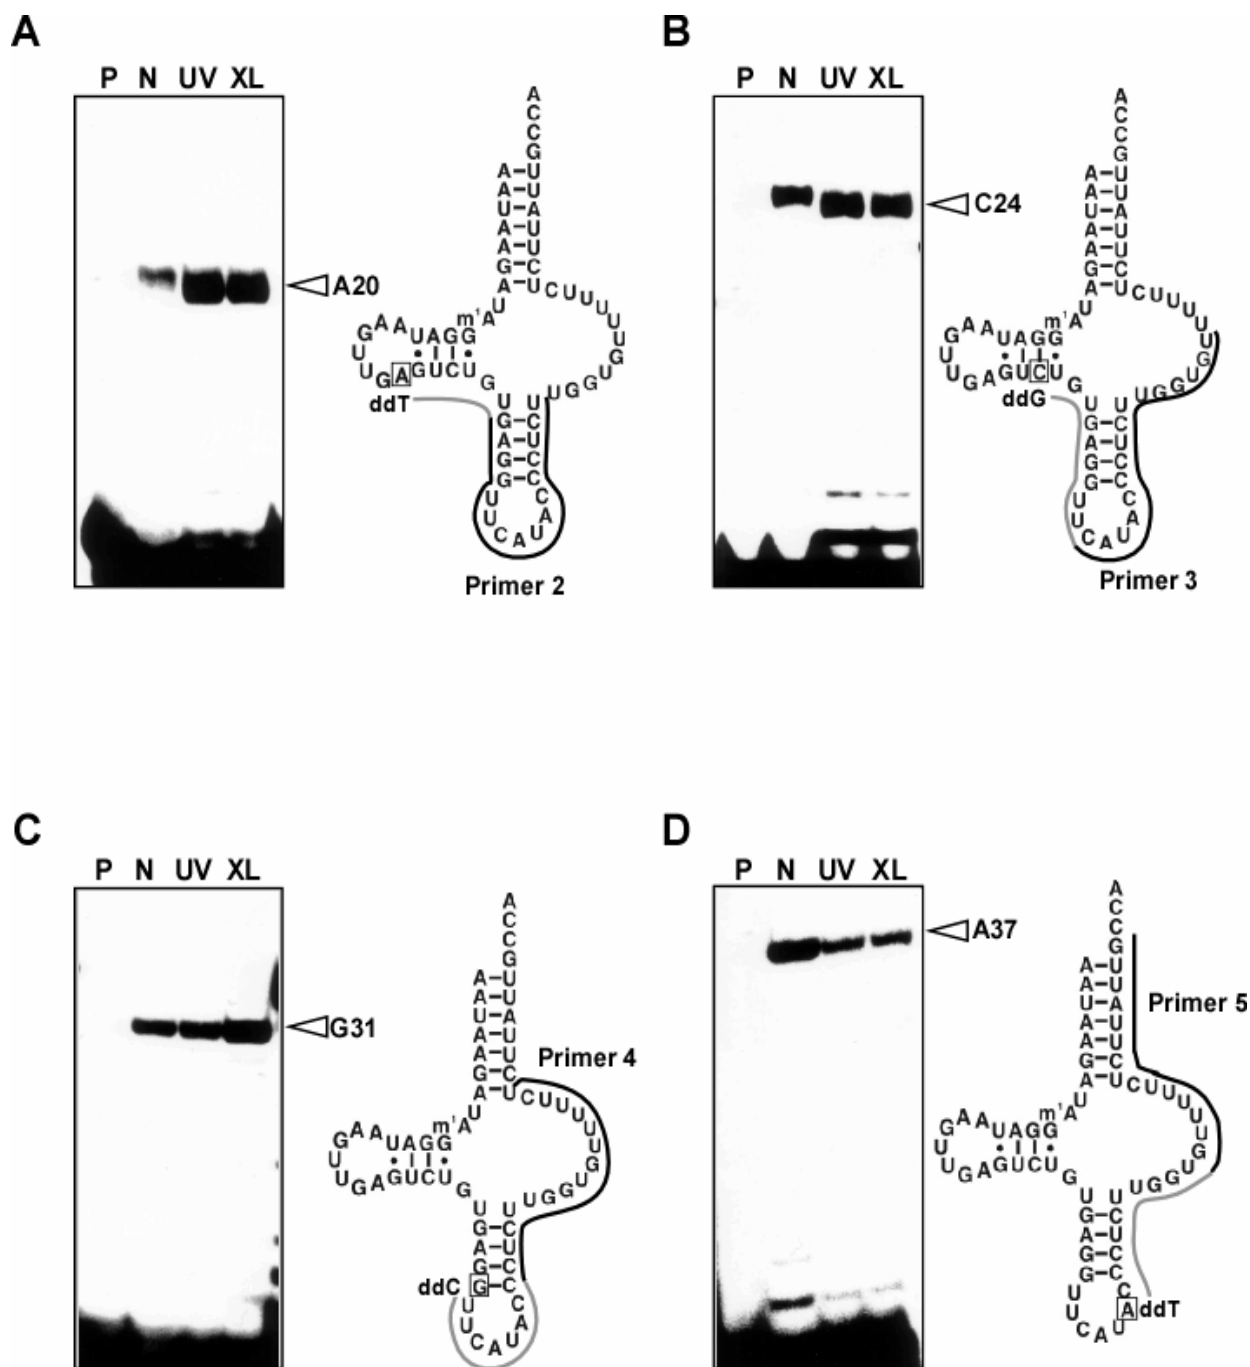

**Supplementary Figure 1.** Primer extension analysis of cross-linked ternary complex using Primer 2 (A), Primer 3 (B), Primer 4 (C), and Primer 5 (D). (Left) A. *sum* mt Val-tRNA<sup>Met</sup> (**lane N**), the ternary complex irradiated by UV (**lane UV**) and the ternary complex irradiated by UV in the presence of 2-iminothiolane (**lane XL**) were analyzed by primer extension on a 15% denaturing polyacrylamide gel. **Lane P**, primer only. Open triangles indicate the position of the primer extension stopped because of the incorporation of dideoxynucleotide by the addition of the ddTTP for (A), ddGTP for (B), ddCTP for (C), and ddTTP for (D), respectively. Black and gray lines indicate the DNA primer and the extension of the primer, respectively.
